# Supplementary material for: Unveiling Altered Hemorheology in Adolescent Idiopathic Scoliosis: A Cross-Sectional Case-Control Study
Source: Research Square preprint supplement (doi:10.21203/rs.3.rs-7383417/v1), 2025-11-26
Supplement: Supplementary file 1 [file d5695c2d902065946efa5915.docx]

Supplementary

**Supplamentary Table-S1: Complete Haemogram Test of the AIS Patients**

|  | **Mean ± SD** | **Range (Min−Max)** | **Ref. Range (Min−Max)** |
| --- | --- | --- | --- |
| **WBC  (10³/µL)** | 6.72 ± 1.85 | 4.60−13.40 | 4.50−13.50 |
| **NEU# (10³/µL)** | 3.74 ± 1.68 | 1.90−9.50 | 2.00−7.00 |
| **MO# (10³/µL)** | 0.44 ± 0.19 | 0.30−1.20 | 0.00−0.80 |
| **LY# (10³/µL)** | 2.32 ± 0.51 | 1.50−3.70 | 1.20−6.50 |
| **EOS# (10³/µL)** | 0.20 ± 0.16 | 0.00−0.60 | 0.00−0.60 |
| **BASO# (10³/µL)** | 0.014 ± 0.036 | 0.00−0.10 | 0.00−0.20 |
| **NEU%** | 54.00 ± 10.20 | 36.60−75.90 | 3.00−12.00 |
| **MO%** | 6.52 ± 1.53 | 3.60−9.30 | 0.00−8.00 |
| **LY%** | 35.90 ± 9.26 | 17.60−55.50 | 15.00−80.00 |
| **EOS%** | 3.02 ± 2.60 | 0.70−10.40 | 0.50−5.00 |
| **BASO%** | 0.526 ± 0.338 | 0.10−1.30 | 0.00−1.00 |
| **RBC (106/µL)** | 4.76 ± 0.35 | 3.96−5.62 | 4.00−5.60 |
| **Hgb (g/dL)** | 13.50 ± 1.05 | 10.60−15.80 | 11.80−17.00 |
| **Hct%** | 40.60 ± 2.58 | 33.30−45.70 | 36.00−49.00 |
| **MCV (fL)** | 85.40 ± 3.28 | 80.10−91.60 | 73.00−98.00 |
| **MCH (pg)** | 28.30 ± 1.18 | 26.30−30.90 | 25.00−34.00 |
| **MCHC (g/dL)** | 33.20 ± 0.86 | 31.550−34.70 | 32.00−36.00 |
| **RDW%** | 13.40 ± 0.92 | 11.80−16.30 | 11.00−16.00 |
| **Plt (10³/µL)** | 279 ± 57.7 | 181−407 | 100−400 |
| **MPV (fL)** | 9.66 ± 0.96 | 8.00−12.10 | 6.00−12.00 |
| **Pct%** | 9.27 ± 0.05 | 0.18−0.38 | 0.108−0.40 |
| **PDW%** | 15.90 ± 0.29 | 15.20−16.40 | 15.00−17.00 |
| **RDW-SD** | 41.30 ± 3.68 | 37.0−49.0 |  |
| **NLR** | 1.71 ± 0.95 | 0.68−4.12 |  |

Hematological parameters of the study population. Values are presented as mean ± standard deviation (SD) along with the observed minimum and maximum values in the sample group. Reference (Ref.) ranges for adolescents are provided for clinical context. WBC: white blood cells; NEU#: absolute neutrophil count; MO#: absolute monocyte count; LY#: absolute lymphocyte count; EOS#: absolute eosinophil count; BASO#: absolute basophil count; NEU%: neutrophil percentage; MO%: monocyte percentage; LY%: lymphocyte percentage; EOS%: eosinophil percentage; BASO%: basophil percentage; RBC: red blood cells; Hgb: hemoglobin; Hct: hematocrit; MCV: mean corpuscular volume; MCH: mean corpuscular hemoglobin; MCHC: mean corpuscular hemoglobin concentration; RDW: red cell distribution width; Plt: platelets; MPV: mean platelet volume; Pct: plateletcrit; PDW: platelet distribution width; RDW-SD: red cell distribution width – standard deviation; NLR: neutrophil-to-lymphocyte ratio.

|  | Cobb angle | Maximum ATR | Cervical Lordosis Angle | Thoracic Kyphosis Angle | Lumbar Lordosis Angle | Beighton Score |
| --- | --- | --- | --- | --- | --- | --- |
| HCT | 0.022 | 0.051 | -0.275 | -0.167 | -0.314 | 0.213 |
| PV 450 s−1 | 0.082 | 0.125 | -0.217 | 0.01 | 0.119 | 0.162 |
| WBV 37.7 s−1 | 0.192 | 0.22 | -0.233 | 0.05 | 0.133 | 0.343 |
| WBV 75 s−1 | 0.223 | 0.196 | -0.307 | 0.009 | 0.122 | 0.332 |
| WBV 112.5 s−1 | 0.197 | 0.154 | -0.338 | 0.02 | 0.114 | 0.348 |
| WBV 150 s−1 | 0.179 | 0.127 | -0.351 | 0.02 | 0.122 | 0.325 |
| WBV 187.5 s−1 | 0.161 | 0.114 | -0.375 | 0.002 | 0.136 | 0.361 |
| WBV 300 s−1 | 0.146 | 0.085 | -0.374 | 0.001 | 0.151 | 0.383 |
| WBV 450 s−1 | 0.131 | 0.069 | -0.408 | -0.053 | 0.133 | 0.392 |
| EI 0.30 Pa | 0.119 | -0.07 | 0.059 | 0.322 | 0.27 | 0.05 |
| EI 0.53 Pa | -0.089 | -0.408 | 0.071 | 0.371 | 0.213 | 0 |
| EI 0.95 Pa | -0.112 | -0.444 | 0.135 | 0.288 | 0.166 | -0.133 |
| EI 1.69 Pa | -0.042 | -0.368 | -0.068 | 0.249 | 0.122 | -0.082 |
| EI 3.00 Pa | 0.044 | -0.27 | 0.032 | 0.238 | 0.067 | -0.1 |
| EI 5.33 Pa | 0.002 | -0.268 | 0.144 | 0.244 | 0.072 | -0.127 |
| EI 9.49 Pa | 0.012 | -0.139 | 0.232 | 0.263 | 0.043 | -0.229 |
| EI 16.87 Pa | 0.04 | -0.043 | 0.121 | 0.191 | 0.061 | -0.188 |
| EI 30.00 Pa | 0.018 | -0.033 | 0.105 | 0.219 | 0.095 | -0.175 |
| EImax | 0.128 | 0.069 | -0.208 | -0.142 | -0.295 | -0.387 |
| SS1/2 | -0.092 | 0.018 | 0.04 | 0.065 | 0.265 | 0.409 |
| SS1/2 : EImax | -0.108 | 0 | -0.006 | 0 | 0.223 | 0.428 |
| AMP | -0.105 | -0.194 | -0.479 | -0.444 | 0.196 | -0.206 |
| AI | 0.141 | -0.119 | -0.293 | -0.228 | 0.182 | -0.113 |
| t1/2 | 0.083 | -0.095 | -0.33 | -0.083 | 0.008 | 0.153 |
| Tr | -0.168 | 0.077 | 0.266 | 0.221 | -0.211 | 0.148 |
| γthr​ | 0.09 | 0.036 | -0.185 | -0.23 | 0.35 | -0.045 |

**Supplamentary Table-S2: Spearman Correlation Between Clinical Parameters and Rheological Indices in Patients with Scoliosis**

Spearman’s rank correlation coefficients (ρ) are shown for associations between clinical parameters (Cobb angle, maximum ATR, spinal curvature angles, Risser stage, and Beighton score) and rheological measurements (hematocrit, plasma viscosity [PV], whole blood viscosity [WBV], erythrocyte deformability index [EI], aggregation index [AI], and related shear stress variables). Correlation coefficients are color-coded according to direction and strength. p-values were corrected for multiple comparisons using the Benjamini-Hochberg false discovery rate (FDR) method. Correlations that remained statistically significant after FDR correction (q < 0.05) are bolded. ATR – Angle of Trunk Rotation; PV – Plasma Viscosity; WBV – Whole Blood Viscosity; EI – Elongation Index; EImax – Maximum Elongation Index; SS1/2 – Shear stress at half-maximal EI; SS1/2:EImax – Ratio of SS1/2 to Eimax; AMP – Amplitude of aggregation; AI – Aggregation Index; t1/2 – Half-time of aggregation; Tr – Aggregation threshold; γthr – Threshold shear rate; FDR – False Discovery Rate.

**Supplamentary Table-S3: Comparison of Rheological Parameters Across Nash-Moe Grades**

|  | **Grade 1**  **(n=13)** | **Grade 2**  **(n=14)** | **Grade 3**  **(n=3)** | **χ²** | **p - value** |
| --- | --- | --- | --- | --- | --- |
| **HCT** | 41.0 (40.0–42.0) | 40.0 (39.2–42.8) | 37.0 (36.5–38.5) | 5.42 | 0.067 |
| **PV 450 s−1** | 1.27 (1.21–1.34) | 1.34 (1.27–1.55) | 1.45 (1.31–1.57) | 3.73 | 0.155 |
| **WBV 37.7 s−1** | 4.84 (3.74–5.64) | 5.40 (4.68–6.07) | 5.21 (4.20–5.46) | 0.92 | 0.632 |
| **WBV 75 s−1** | 4.32 (3.46–4.84) | 4.63 (4.14–5.03) | 4.29 (3.47–4.66) | 0.83 | 0.660 |
| **WBV 112.5 s−1** | 4.07 (2.80–4.68) | 4.36 (3.93–4.67) | 4.07 (3.30–4.40) | 0.42 | 0.810 |
| **WBV 150 s−1** | 3.89 (2.74–4.48) | 4.20 (3.78–4.45) | 3.89 (3.16–4.20) | 0.25 | 0.882 |
| **WBV 187.5 s−1** | 3.80 (2.60–4.37) | 4.06 (3.67–4.29) | 3.78 (2.89–4.06) | 0.17 | 0.919 |
| **WBV 300 s−1** | 3.59 (2.46–4.11) | 3.84 (3.49–4.02) | 3.57 (2.89–3.84) | 0.18 | 0.913 |
| **WBV 450 s−1** | 3.43 (2.44–3.93) | 3.68 (3.34–3.86) | 3.42 (2.77–3.67) | 0.22 | 0.897 |
| **EI 0.30 Pa** | 0.10 (0.09–0.11) | 0.09 (0.09–0.10) | 0.10 (0.10–0.10) | 0.83 | 0.660 |
| **EI 0.53 Pa** | 0.15 (0.15–0.16) | 0.15 (0.14–0.16) | 0.15 (0.15–0.17) | 0.89 | 0.640 |
| **EI 0.95 Pa** | 0.23 (0.22–0.24) | 0.23 (0.22–0.24) | 0.23 (0.22–0.24) | 0.76 | 0.682 |
| **EI 1.69 Pa** | 0.31 (0.31–0.32) | 0.31 (0.30–0.32) | 0.30 (0.30–0.32) | 0.27 | 0.875 |
| **EI 3.00 Pa** | 0.40 (0.39–0.41) | 0.40 (0.39–0.41) | 0.40 (0.39–0.41) | 0.03 | 0.986 |
| **EI 5.33 Pa** | 0.48 (0.47–0.48) | 0.47 (0.46–0.48) | 0.48 (0.47–0.49) | 0.13 | 0.939 |
| **EI 9.49 Pa** | 0.53 (0.53–0.54) | 0.53 (0.52–0.53) | 0.54 (0.53–0.54) | 0.87 | 0.647 |
| **EI 16.87 Pa** | 0.57 (0.57–0.58) | 0.57 (0.57–0.57) | 0.58 (0.57–0.58) | 1.58 | 0.454 |
| **EI 30.00 Pa** | 0.61 (0.60–0.61) | 0.60 (0.60–0.61) | 0.61 (0.60–0.61) | 1.32 | 0.517 |
| **EImax** | 0.66 (0.65–1.53) | 0.65 (0.64–1.52) | 0.67 (0.66–1.38) | 1.53 | 0.466 |
| **SS1/2** | 1.60 (0.66–1.90) | 1.49 (0.65–1.85) | 1.38 (1.01–1.63) | 0.18 | 0.916 |
| **SS1/2 : EImax** | 2.46 (0.43–2.93) | 2.32 (0.43–2.84) | 2.08 (1.93–2.48) | 0.61 | 0.738 |
| **AMP** | 46.5 (44.9–48.4) | 43.5 (42.0–45.4) | 45.6 (43.7–49.3) | 7.76 | 0.021 |
| **AI** | 62.0 (51.3–67.5) | 67.8 (60.9–69.2) | 69.0 (61.7–70.0) | 1.50 | 0.473 |
| **t1/2** | 2.35 (1.89–3.76) | 1.78 (1.68–2.54) | 1.67 (1.60–2.48) | 0.01 | 0.993 |
| **Tr** | 85.4 (0.0–111.1) | 89.0 (79.9–98.1) | 84.6 (42.3–101.0) | 1.60 | 0.449 |
| **γthr​** | 233 (180–281) | 170 (160–180) | 800 (450–800) | 2.70 | 0.259 |

Data are presented as median (interquartile range, IQR). Comparisons were performed using the Kruskal-Wallis H test. χ² represents the Kruskal-Wallis test statistic. No statistically significant differences were observed among Nash-Moe Grade groups (p ≥ 0.05). PV – Plasma Viscosity; WBV – Whole Blood Viscosity; EI – Elongation Index; EImax – Maximum Elongation Index; SS1/2 – Shear stress at half-maximal EI; SS1/2:EImax – Ratio of SS1/2 to EImax; AMP – Amplitude of aggregation; AI – Aggregation Index; t1/2 – Half-time of aggregation; Tr – Aggregation threshold; γthr – Threshold shear rate

|  | **Thoracic**  **(n=7)** | **Lumbar**  **(n=3)** | **Thoracolumbar (n=10)** | **χ²** | **p - value** |
| --- | --- | --- | --- | --- | --- |
| **HCT** | 40.0 (40.0–41.5) | 40.0 (39.0–40.0) | 42.0 (40.0–43.8) | 3.86 | 0.145 |
| **PV 450 s−1** | 1.30 (1.24–1.40) | 1.31 (1.21–1.54) | 1.32 (1.27–1.53) | 0.73 | 0.693 |
| **WBV 37.7 s−1** | 5.21 (4.97–5.37) | 4.84 (3.68–5.70) | 5.74 (4.74–6.07) | 0.76 | 0.685 |
| **WBV 75 s−1** | 4.35 (4.22–4.59) | 4.11 (2.97–5.00) | 4.90 (4.16–5.14) | 1.48 | 0.477 |
| **WBV 112.5 s−1** | 4.11 (4.02–4.59) | 3.82 (2.68–4.68) | 4.60 (3.96–4.77) | 1.21 | 0.545 |
| **WBV 150 s−1** | 3.95 (3.86–4.12) | 3.60 (2.50–4.45) | 4.41 (3.79–4.51) | 1.02 | 0.600 |
| **WBV 187.5 s−1** | 3.87 (3.76–3.99) | 3.52 (2.35–4.29) | 4.28 (3.69–4.37) | 1.51 | 0.470 |
| **WBV 300 s−1** | 3.66 (3.57–3.79) | 3.30 (2.21–4.03) | 4.02 (3.49–4.11) | 1.55 | 0.461 |
| **WBV 450 s−1** | 3.52 (3.43–3.64) | 3.11 (2.11–3.86) | 3.87 (3.33–3.94) | 2.04 | 0.360 |
| **EI 0.30 Pa** | 0.09 (0.09–0.11) | 0.10 (0.09–0.11) | 0.09 (0.09–0.10) | 0.91 | 0.633 |
| **EI 0.53 Pa** | 0.15 (0.14–0.15) | 0.15 (0.15–0.17) | 0.15 (0.14–0.16) | 1.76 | 0.416 |
| **EI 0.95 Pa** | 0.23 (0.22–0.24) | 0.23 (0.22–0.24) | 0.23 (0.22–0.23) | 0.44 | 0.804 |
| **EI 1.69 Pa** | 0.31 (0.30–0.32) | 0.31 (0.30–0.33) | 0.31 (0.30–0.32) | 0.99 | 0.610 |
| **EI 3.00 Pa** | 0.40 (0.39–0.40) | 0.40 (0.39–0.41) | 0.40 (0.39–0.41) | 0.11 | 0.944 |
| **EI 5.33 Pa** | 0.48 (0.47–0.48) | 0.47 (0.46–0.48) | 0.48 (0.47–0.48) | 0.06 | 0.969 |
| **EI 9.49 Pa** | 0.53 (0.53–0.54) | 0.53 (0.52–0.53) | 0.53 (0.52–0.54) | 0.40 | 0.819 |
| **EI 16.87 Pa** | 0.58 (0.57–0.58) | 0.57 (0.57–0.57) | 0.57 (0.57–0.58) | 0.75 | 0.687 |
| **EI 30.00 Pa** | 0.61 (0.60–0.61) | 0.60 (0.60–0.61) | 0.60 (0.60–0.61) | 0.92 | 0.632 |
| **EImax** | 0.65 (0.64–1.30) | 0.66 (0.65–1.60) | 0.66 (0.65–1.31) | 0.56 | 0.756 |
| **SS1/2** | 1.40 (1.01–1.89) | 1.33 (0.66–1.68) | 1.76 (0.89–1.91) | 1.03 | 0.598 |
| **SS1/2 : EImax** | 2.18 (1.21–2.93) | 2.07 (0.40–2.58) | 2.68 (0.94–2.92) | 1.71 | 0.425 |
| **AMP** | 44.0 (44.5–45.7) | 43.5 (42.2–45.3) | 46.5 (45.5–47.8) | 3.76 | 0.153 |
| **AI** | 61.2 (48.7–68.3) | 67.8 (57.7–71.7) | 64.3 (56.9–68.7) | 1.96 | 0.376 |
| **t1/2** | 2.44 (1.73–4.24) | 1.78 (1.42–2.92) | 2.12 (1.75–3.05) | 1.79 | 0.409 |
| **Tr** | 73.3 (0.0–103.1) | 84.6 (79.5–90.1) | 98.6 (84.2–106.4) | 2.25 | 0.324 |
| **γthr​** | 200 (165–233) | 170 (150–638) | 193 (180–269) | 0.17 | 0.919 |

**Supplamentary Table-S4: Comparison of Rheological Parameters Across Scoliosis Locations**

Data are presented as median (interquartile range, IQR). Comparisons were performed using the Kruskal-Wallis H test. χ² represents the Kruskal-Wallis test statistic. No statistically significant differences were observed among scoliosis region groups (p ≥ 0.05). PV – Plasma Viscosity; WBV – Whole Blood Viscosity; EI – Elongation Index; EImax – Maximum Elongation Index; SS1/2 – Shear stress at half-maximal EI; SS1/2:EImax – Ratio of SS1/2 to EImax; AMP – Amplitude of aggregation; AI – Aggregation Index; t1/2 – Half-time of aggregation; Tr – Aggregation threshold; γthr – Threshold shear rate

**Supplamentary Table-S5: Comparison of Rheological Parameters Across Kyphosis Classification Groups**

|  | **Normal**  **(n=16)** | **Hypokyphosis (n=10)** | **Hyperkyphosis (n=4)** | **χ²** | **p - value** |
| --- | --- | --- | --- | --- | --- |
| **HCT** | 40.0 (40.0–42.3) | 41.5 (40.0–42.8) | 39.0 (38.5–39.3) | 5.27 | 0.072 |
| **PV 450 s−1** | 1.33 (1.25–1.54) | 1.328(1.23–1.42) | 1.27 (1.21–1.41) | 0.45 | 0.799 |
| **WBV 37.7 s−1** | 5.45 (4.84–6.07) | 4.94 (3.78–5.49) | 3.80 (3.24–4.69) | 4.67 | 0.097 |
| **WBV 75 s−1** | 4.69 (4.13–5.07) | 4.34 (3.24–4.77) | 2.97 (2.89–3.49) | 2.73 | 0.256 |
| **WBV 112.5 s−1** | 4.48 (3.90–4.71) | 4.09 (3.09–4.52) | 2.71 (2.64–3.24) | 2.26 | 0.323 |
| **WBV 150 s−1** | 4.29 (3.72–4.49) | 3.96 (3.01–4.36) | 2.51 (2.48–3.01) | 2.01 | 0.366 |
| **WBV 187.5 s−1** | 4.13 (3.62–4.33) | 3.85 (2.88–4.27) | 2.45 (2.35–2.99) | 1.91 | 0.385 |
| **WBV 300 s−1** | 3.86 (3.42–4.07) | 3.64 (2.74–4.02) | 2.37 (2.19–2.91) | 1.64 | 0.441 |
| **WBV 450 s−1** | 3.68 (3.25–3.90) | 3.50 (2.69–3.87) | 2.26 (2.09–2.78) | 2.18 | 0.337 |
| **EI 0.30 Pa** | 0.10 (0.09–0.10) | 0.09 (0.08–0.10) | 0.10 (0.09–0.11) | 2.37 | 0.306 |
| **EI 0.53 Pa** | 0.16 (0.15–0.16) | 0.14 (0.13–0.15) | 0.16 (0.15–0.18) | 4.59 | 0.101 |
| **EI 0.95 Pa** | 0.23 (0.22–0.24) | 0.22 (0.20–0.23) | 0.24 (0.22–0.26) | 3.25 | 0.197 |
| **EI 1.69 Pa** | 0.31 (0.31–0.32) | 0.31 (0.29–0.32) | 0.32 (0.30–0.34) | 2.35 | 0.309 |
| **EI 3.00 Pa** | 0.40 (0.40–0.41) | 0.39 (0.38–0.40) | 0.41 (0.39–0.43) | 2.62 | 0.270 |
| **EI 5.33 Pa** | 0.48 (0.47–0.48) | 0.47 (0.46–0.48) | 0.48 (0.47–0.50) | 1.60 | 0.449 |
| **EI 9.49 Pa** | 0.53 (0.52–0.54) | 0.53 (0.52–0.53) | 0.54 (0.53–0.55) | 1.21 | 0.547 |
| **EI 16.87 Pa** | 0.57 (0.57–0.58) | 0.57 (0.57–0.58) | 0.58 (0.57–0.58) | 0.45 | 0.797 |
| **EI 30.00 Pa** | 0.60 (0.60–0.61) | 0.60 (0.60–0.61) | 0.61 (0.60–0.61) | 0.74 | 0.692 |
| **EImax** | 0.65 (0.64–1.34) | 0.66 (0.65–1.63) | 0.66 (0.65–1.02) | 1.27 | 0.53 |
| **SS1/2** | 1.59 (0.66–1.88) | 1.59 (1.65–1.96) | 1.36 (1.16–1.46) | 0.45 | 0.797 |
| **SS1/2 : EImax** | 2.46 (0.50–2.88) | 2.43 (0.39–2.09) | 2.07 (1.63–2.20) | 1.21 | 0.547 |
| **AMP** | 45.0 (43.2–45.6) | 46.1 (45.8–48.1) | 42.1 (41.7–45.1) | 4.57 | 0.102 |
| **AI** | 65.9 (49.6–69.6) | 62.7 (61.2–69.0) | 64.4 (59.3–68.6) | 0.03 | 0.985 |
| **t1/2** | 1.97 (1.66–4.06) | 2.26 (1.70–2.44) | 2.16 (1.72–2.73) | 0.11 | 0.945 |
| **Tr** | 89.0 (39.8–97.2) | 98.1 (0.0–106.8) | 82.3 (79.8–92.8) | 0.01 | 0.996 |
| **γthr​** | 180 (150–413) | 195 (170–275) | 165 (145–328) | 0.47 | 0.792 |

Data are presented as median (interquartile range, IQR). Comparisons were performed using the Kruskal-Wallis H test. χ² represents the Kruskal-Wallis test statistic. No statistically significant differences were observed among hyphosis classification groups (p ≥ 0.05). PV – Plasma Viscosity; WBV – Whole Blood Viscosity; EI – Elongation Index; EImax – Maximum Elongation Index; SS1/2 – Shear stress at half-maximal EI; SS1/2:EImax – Ratio of SS1/2 to EImax; AMP – Amplitude of aggregation; AI – Aggregation Index; t1/2 – Half-time of aggregation; Tr – Aggregation threshold; γthr – Threshold shear rate
